# Supplementary material
Source: publisher site journal article supplement (https://www.dovepress.com/article/supplementary_file/590583/590583%20Supplementary%20Table%20S1.xlsx)
Supplement: Supplementary file 1 [file 590583%20Supplementary%20Table%20S1.xlsx]

## Sheet: Supplementary Table S1_
id.exposure	id.outcome	outcome	exposure	method	nsnp	b	se	pval	lo_ci	up_ci	or	or_lci95	or_uci95	pvalue	log2_OR
xJdGJJ	LM7KIp	ebi-a-GCST90018838.vcf	C1QTNF6	Inverse variance weighted	20	-0.220785	0.0425623	2.13e-07	-0.304207	-0.137363	0.801889	0.737708	0.871654	2.13e-07	-0.318525
h12HER	LM7KIp	ebi-a-GCST90018838.vcf	CAPG	Inverse variance weighted	42	-0.0927422	0.0229429	5.29e-05	-0.13771	-0.0477741	0.911428	0.871351	0.953349	5.29e-05	-0.133799
Te0jom	LM7KIp	ebi-a-GCST90018838.vcf	HAVCR2	Inverse variance weighted	15	-0.387784	0.100424	0.000112714	-0.584615	-0.190952	0.678559	0.55732	0.826172	0.000112714	-0.559453
gqJjM7	LM7KIp	ebi-a-GCST90018838.vcf	BRI3	Inverse variance weighted	18	0.148432	0.0477423	0.00187701	0.0548575	0.242007	1.16001	1.05639	1.2738	0.00187701	0.214143
JfoCbb	LM7KIp	ebi-a-GCST90018838.vcf	GZMK	Inverse variance weighted	11	-0.299323	0.0976442	0.00217347	-0.490705	-0.10794	0.74132	0.612194	0.897681	0.00217347	-0.431832
jOF8mN	LM7KIp	ebi-a-GCST90018838.vcf	HMGN4	Inverse variance weighted	33	0.090836	0.031722	0.00418988	0.0286609	0.153011	1.09509	1.02908	1.16534	0.00418988	0.131049
k6hUWc	LM7KIp	ebi-a-GCST90018838.vcf	ITGAX	Inverse variance weighted	44	-0.0716231	0.0253695	0.00475467	-0.121347	-0.021899	0.930882	0.885726	0.978339	0.00475467	-0.10333
XfhTmX	LM7KIp	ebi-a-GCST90018838.vcf	RPL17	Inverse variance weighted	26	0.121082	0.045369	0.00761187	0.0321584	0.210005	1.12872	1.03268	1.23368	0.00761187	0.174684
JeYIkw	LM7KIp	ebi-a-GCST90018838.vcf	GLRX5	Inverse variance weighted	22	-0.122932	0.050354	0.0146319	-0.221626	-0.0242386	0.884323	0.801215	0.976053	0.0146319	-0.177354
UeiAVJ	LM7KIp	ebi-a-GCST90018838.vcf	STEAP4	Inverse variance weighted	53	0.067594	0.0282075	0.0165611	0.0123072	0.122881	1.06993	1.01238	1.13075	0.0165611	0.0975175
RH5XRy	LM7KIp	ebi-a-GCST90018838.vcf	TMEM45A	Inverse variance weighted	21	0.124653	0.0529754	0.0186208	0.0208213	0.228485	1.13276	1.02104	1.25669	0.0186208	0.179836
bsAXWJ	LM7KIp	ebi-a-GCST90018838.vcf	XCL1	Inverse variance weighted	32	0.0999578	0.043197	0.0206677	0.0152917	0.184624	1.10512	1.01541	1.20277	0.0206677	0.144209
xJYVnD	LM7KIp	ebi-a-GCST90018838.vcf	TNXB	Inverse variance weighted	25	-0.0750753	0.0333485	0.0243707	-0.140438	-0.00971221	0.927674	0.868977	0.990335	0.0243707	-0.108311
IZfoqU	LM7KIp	ebi-a-GCST90018838.vcf	FBN1	Inverse variance weighted	9	0.202794	0.0922115	0.0278617	0.0220596	0.383529	1.22482	1.0223	1.46745	0.0278617	0.29257
eTTpzM	LM7KIp	ebi-a-GCST90018838.vcf	GZMA	Inverse variance weighted	7	-0.368198	0.174358	0.034709	-0.70994	-0.0264565	0.69198	0.491673	0.97389	0.034709	-0.531198
CfOqh7	LM7KIp	ebi-a-GCST90018838.vcf	KLRC1	Inverse variance weighted	38	0.0741411	0.0372301	0.0464339	0.00117004	0.147112	1.07696	1.00117	1.15848	0.0464339	0.106963
2oOqXI	LM7KIp	ebi-a-GCST90018838.vcf	DBNDD2	Inverse variance weighted	2	-0.852201	0.428048	0.0464919	-1.69118	-0.0132266	0.426475	0.184303	0.986861	0.0464919	-1.22947
Owd0rv	LM7KIp	ebi-a-GCST90018838.vcf	POLR2J3	Inverse variance weighted	26	-0.0601078	0.0306538	0.0498956	-0.120189	-2.63e-05	0.941663	0.886752	0.999974	0.0498956	-0.0867173
